1 **Title:** Reticulate evolution in a neutral model: speciation, extinctions, and hybridiza-  
2 tions

3

4 **Running title:** Reticulate evolution in a neutral model

5

6 **Authors:**

7

8 **Larissa Lubiana Botelho**

9 affiliation:

10 Instituto de Física ‘Gleb Wataghin’, Universidade Estadual de Campinas, 13083-970,  
11 Campinas, SP, Brazil email: larissalbotelho@gmail.com

12 **Flavia Maria Darcie Marquitti** (corresponding author)

13 affiliation:

14 Instituto de Física ‘Gleb Wataghin’, Universidade Estadual de Campinas, 13083-970,  
15 Campinas, SP, Brazil email: flamarquitti@gmail.com; phone: +55 19 35215468

16 **Marcus Aloizio Martinez de Aguiar**

17 affiliation:

18 Instituto de Física ‘Gleb Wataghin’, Universidade Estadual de Campinas, 13083-970,  
19 Campinas, SP, Brazil email: aguiar@ifi.unicamp.br

## 20 **Author contributions**

21 MAMA, FMDM, and LLB conceived the idea and elaborated the computing code.  
22 LLB performed the simulations. FMDM, LLB and MAMA wrote the manuscript and  
23 discussed the results.

24

## Abstract

25

26

27

28

29

30

31

32

33

34

35

36

37

38

39

40

41

42

Evolution is usually pictured as a tree where ancient species branch into new ones and eventually disappear. In this simplified view, the balance between speciation and extinction fully determines the diversity of life. Hybridization, however, introduces another level of complexity, allowing neighboring branches of the tree to interact, mixing their genetic content. This generates further diversity leading to reticulated phylogenetic trees. In this paper we study processes of speciation, extinction and hybridization using a genetically and spatially explicit neutral model of diversification. Speciation, extinction and hybridization events are tracked throughout the evolutionary process leading to complete and exact phylogenetic trees. We found that genome size played a key role in these processes, increasing the extinction rate and decreasing the hybridization rate. In our simulations, hybridization after one speciation event occurred throughout the evolutionary process but hybridization after two speciation events was only observed during the initial radiation. Most hybridization occurred between relatively abundant species, discarding lack of sexual partners or small population sizes as potential causes. We found that hybridization occurred mostly because of opportunity (genetic similarity and spatial proximity) between recently branched species, when the number of accumulated mutations is not yet too large.

43

**Keywords:** Individual Based Model, diversification, non-adaptive radiation

44

## Introduction

45

46

47

48

49

50

51

52

53

54

55

56

The evolutionary process cannot always be represented by a tree like structure where species, once formed, can only branch again into new species or go extinct. Hybridization, through the breakdown of reproductive barriers, lineage fusion and speciation reversal, can merge branches, introducing loops, or reticulation, in the phylogenetic structure (Kleindorfer et al., 2014; Garrick et al., 2014; MacLeod et al., 2015; Rudman and Schluter, 2016; Kearns et al., 2018; Pyron et al., 2020).

Phylogenies that do not take into consideration processes that lead to reticulation, like hybridization, can lead to the construction of incompatible trees that are not verisimilar representations of the real tree (Zhang et al., 2021). Detecting hybridization, however, can be challenging. Purebreds, for example, can quickly be replaced by a group of admixed individuals with few signatures of its evolutionary history (Garrick et al., 2014). Also, newly separated species with

57 weak reproductive barriers can interbreed again for short periods of time before  
58 eventually splitting into well separated species, leaving no records of the hybrids  
59 (Seehausen, 2004). However molecular tools, such as mitochondrial DNA anal-  
60 ysis, are allowing the detection of introgressive hybridization in extant species.  
61 Galapagos giant tortoises from the island of Isabela (Garrick et al., 2014) and  
62 marine iguanas from the San Cristóbal island (MacLeod et al., 2015) are very  
63 well studied species that have undergone fusion processes. Moreover, even after  
64 reproductive isolation has been established, speciation reversal might still oc-  
65 cur, as has been found in the North American Common Ravens (Kearns et al.,  
66 2018). Speciation has also been undone among finches of the Floreana Island  
67 and it seems to be responsible for the disappearance of the large tree finch *Ca-*  
68 *marhynchus psittacula* and it is likely that other two species of finches (*C. pauper*  
69 and *C. parvulus*) are merging into one (Kleindorfer et al., 2014). Recently, the  
70 merging of two *Geospiza* species (*G. fortis* and *G. scandens*) has been happening  
71 and it is observed since 1982. The forecast, according to the rates of introgres-  
72 sion, is that they complete the speciation in reverse between 2049 (genetically)  
73 and 2057 (morphologically) (Grant et al., 2004; Grant and Grant, 2014).

74 Usually, hybridization is referred to two opposite effects: first as an impor-  
75 tant process by which new pathways to genetic diversity and novelties arise and,  
76 second, as a mechanism by which species diversity is diminished. Hybridization  
77 increases the number of species if there is no backcrossing to the parents and if  
78 speciation happens after as a consequence, for instance, of advantageous novelties  
79 or by fast reproductive isolation (Seehausen, 2004; Abbott et al., 2013; Lamich-  
80 haney et al., 2018). On the other hand, hybridization can cause loss of diversity  
81 by the extinction of species (through genetic swamping and demographic swamp-  
82 ing), lineage fusion, speciation reversal and by the breakdown of reproductive  
83 barriers (Todesco et al., 2016). In this study we focused on hybridization as a  
84 mechanism through which diversity is diminished. Many factors can boost the

85 occurrence of hybridization events: the scarcity of sexual mates (Willis et al.,  
86 2011), the recognition failure of co-specific partners (e.g., misimprinting) (Grant  
87 and Grant, 1997, 2014), and also fast environmental changes and anthropogenic  
88 changes, such as climate change and habitat loss (Seehausen et al., 2008; Klein-  
89 dorfer et al., 2014), are pointed as important forces for increasing reproduction  
90 between individuals of different species. However, the importance of hybridiza-  
91 tion in decreasing diversity may be underrated because of the difficult to detect  
92 it in biological data and also because many of them can happen only for a few  
93 generations.

94 In this study we present an extension of a spatially explicit evolutionary model  
95 in a neutral scenario (de Aguiar et al., 2009; de Aguiar, 2017; Costa et al., 2019)  
96 and use it to characterize the processes of hybridization and extinction. In this  
97 model, in which species emerge in response to genetic and spatial restrictions  
98 imposed on reproduction, processes that decrease diversity (extinction and hy-  
99 bridization) are also emergent events. We start with a genetically uniform pop-  
100 ulation, which radiates into many species until it reaches an equilibration of the  
101 species diversity (see Fig. S1 in the SM showing the number of extant species  
102 across generations). To characterize the different processes that occur during its  
103 evolution we keep track, at every generation, of all events of speciation, extinc-  
104 tion and hybridization. This allows us to compute true and complete phylogenies,  
105 from its root at  $T = 0$  to the leafs at present time, containing all events that ever  
106 occurred in that population. This offers a theoretical methodology that avoids the  
107 common loss of evolutionary information caused by gene flow (Zhang et al., 2021).  
108 Previous theoretical studies have focused on hybridization (and on extinction in  
109 some cases) using non-neutral models (McCarthy et al., 1995; Buerkle et al., 2000;  
110 Duenez-Guzman et al., 2009; Kagawa and Takimoto, 2018). In this work we use a  
111 neutral model in which individuals have no advantages or disadvantages in their  
112 reproduction, or in their death probabilities, and mating is restricted by spatial



113 proximity and genetic similarity (only individuals belonging to the same species  
114 can mate) but is otherwise random.

115 We focus our analysis on three points concerning the events of true extinctions  
116 and hybridization: (i) when they occur in the evolutionary history; (ii) what are  
117 species abundances at the moment of the event and; (iii) what is the life time of  
118 the species up to the moment of the event. We also show that these features are  
119 strongly affected by the amount of information that are important for the genetic  
120 isolation. We believe that the characterization of these events in a neutral scenario  
121 can shed light on how hybridization events contribute to the evolutionary history.

## 122 **Methods**

### 123 **Evolutionary model**

124 Our simulations were performed with the individual based model (IBM) of spe-  
125 ciation proposed in Costa et al. (2019), which is an adaptation of the model of  
126 de Aguiar et al. (2009). The parameters used in this work are similar to those  
127 used in de Aguiar et al. (2009), which generated patterns of diversity compat-  
128 ible with empirical data. One of these parameters is the genome size  $B$ . We  
129 remark, however, that  $B$  should not be directly compared with number of genes  
130 or base pairs in real genomes. The number of loci should rather be interpreted as  
131 the amount of inheritable information carried by the individual, that we roughly  
132 classify as small ( $B = 150$ ), medium ( $B = 1500$ ) and large ( $B = 15000$ ). In  
133 the simulations, population sizes are small, otherwise computational times be-  
134 comes too large. The relation between the model parameters and the viability of  
135 speciation are discussed in (Baptestini et al., 2013).

136 We simulate the evolution of a population of  $M$  haploid individuals, randomly  
137 distributed in a spatial square area consisting of  $L \times L$  discrete lattice sites with

138 periodic boundary conditions. Individuals are assigned a genome represented by  
139 a binary string of size  $B$ ,  $(\sigma_1^i, \sigma_2^i, \dots, \sigma_B^i)$ ,  $i = 1, 2, \dots, M$ , where each *locus*  $k$   
140 of an individual  $i$ ,  $\sigma_k^i$ , can assume the allele values 0 or 1. Their spatial po-  
141 sition is specified by the coordinates  $(x_i, y_i)$  on the lattice plane. The genetic  
142 distance  $d^{(i,j)}$  between two individuals  $i$  and  $j$  is the Hamming distance between  
143 the corresponding sequences and measures the number of genes bearing different  
144 alleles:

$$d^{(i,j)} = \sum_{k=1}^B |\sigma_k^i - \sigma_k^j| \quad (1)$$

145 The spatial distance  $s^{(i,j)}$  between individuals  $i$  and  $j$  can be computed as:

$$s^{(i,j)} = \sqrt{x_{ij}^2 + y_{ij}^2} \quad (2)$$

146 where  $x_{ij}$  and  $y_{ij}$  are distances between the individuals  $i$  and  $j$  in the  $x$  and  $y$   
147 directions, taking into account the periodic boundary conditions.

148       Reproduction is sexual and time is counted in number of generations, which  
149 are non-overlapping. Mate choice is restricted by spatial and genetic distances.  
150 The spatial radius  $S$  defines the *mating range*, a circular neighborhood centered  
151 on the *focal* individual, where it looks for potential mates, and  $G$  specifies the  
152 *genetic threshold of reproductive isolation*, which is the maximum number of ge-  
153 netic differences that defines compatibility. Therefore, the focal individual  $i$  mates  
154 only with a compatible individual  $j$  ( $s^{(i,j)} \leq S$  and  $d(i,j) \leq G$ ), that is chosen  
155 randomly with uniform probability. In the simulations, we used  $G = 0.05B$   
156 and different sizes of genome:  $B = \{150; 1500; 15000\}$ . Each individual has a  
157 chance of reproducing, but there is a probability  $Q$  that it will not do so. In  
158 that case, another individual from its mating range is randomly chosen to repro-  
159 duce in its place, keeping the population size constant. In our simulations, we

160 set  $Q = 0.37 \approx e^{-1}$ , which corresponds approximately to the probability that  
161 an individual is not selected in  $M$  trials with replacement, in accordance with  
162 the Derrida-Higgs model (Higgs and Derrida, 1991; de Aguiar, 2017). The off-  
163 spring inherits, *locus* by *locus*, the allele of either parent with equal probability,  
164 but each *locus* is also subjected to mutations with probability  $\mu$  ( $\mu = 0.00025$   
165 in our simulations). Offspring are either positioned at the location of the focal  
166 parental or it disperses with probability  $D$  (here we set  $D = 0.01$ ) to one of the  
167 20 nearest sites. This guarantees that close to the location of every individual  
168 of the previous generation there will be an individual in the present generation,  
169 avoiding the formation of spatial inhomogeneities. The process is repeated until  
170 all  $M$  individuals had a chance to reproduce, completing one generation.

171 If the number of individuals in the mating range  $S$  is smaller than a threshold  
172 value  $I$  ( $I = 3$  in our simulations) the individual expands the search radius to  $S +$   
173 1. If the number of compatible mates is still smaller than  $I$ , the process is repeated  
174 once more to  $S + 2$ , and if there is still less than  $I$  potential mates, another  
175 neighbor is randomly selected to reproduce in its place. If the neighborhood  
176 is empty, which might happen for small values of  $S$ , reproduction fails and the  
177 population decreases by 1. In that case individuals of the next generation will  
178 have the opportunity to have a second offspring in order to increase the population  
179 back to the specified value  $M$ . Therefore, for small mating neighborhoods the  
180 population size might fluctuate slightly around  $M$ .

181 Species are identified as groups of individuals reproductively isolated from all  
182 others by the genetic threshold  $G$  (de Aguiar et al., 2009; Costa et al., 2019).  
183 It may happen that two individuals of the same species are above the genetic  
184 threshold but have an indirect gene flow through a third individual, which can  
185 mate with both. No condition, such as the closest individual in spatial distance or  
186 with higher genetic similarity for mating, is imposed on the members of a species.  
187 At the beginning, individuals are genetically identical and uniformly distributed

188 in the space.

## 189 **Evolutionary events and their detection**

190 Throughout the evolutionary process, mutations and recombinations create ge-  
191 netic diversity that will eventually lead to speciation for certain sets of parameters  
192 (de Aguiar et al., 2009; Costa et al., 2019). Because there is a probability  $Q$  of  
193 non-reproduction associated to each individual, the number of species does not  
194 remain constant in time. Extinction and hybridization naturally occur during  
195 evolution and are, therefore, emergent processes in our model. To detect and  
196 characterize these events, we define them in detail below. They are also illus-  
197 trated in Figure 1.

### 198 **True extinctions**

199 Since not all individuals reproduce, there are random fluctuations in species abun-  
200 dances that might lead to true extinction. True extinctions will be identified as  
201 an event in which individuals of a species leave no offspring to the next gener-  
202 ation. This happens when the species has a very small number of individuals  
203 (usually of the order of 3 or less) and none reproduces either by chance (probabil-  
204 ity  $Q^3 \approx 0.05$  for a species with 3 individuals) or by lack of compatible partners  
205 in their mating neighborhoods.

### 206 **Hybridization after one speciation process – H1**

207 An H1 event occurs when a species  $A$  splits into  $A'$  and  $A''$  and these new species  
208 merge back into a single species, as illustrated in the second panel of Fig. 1. Right  
209 after speciation, the genetic distance between pairs of individuals belonging to  $A'$   
210 and  $A''$  is only slightly larger than the threshold  $G$ , and a few mutations (usually  
211 a single one), as well as genetic recombination, might make  $d^{(i,j)} \leq G$  for some

212  $i \in A'$  and  $j \in A''$ . This phenomenon is more probable for small genome sizes.  
 213 For large genomes, the chance that a mutation will happen in the right locus to  
 214 decrease the genetic distance between individuals, for example, is small.

## 215 Hybridization after two speciation processes – H2

216 An H2 event occurs when a species  $A$  splits into  $A'$  and  $B$  and  $A'$ , in turn, splits  
 217 later on into  $A''$  and  $C$  (see third panel of Fig. 1). An H2 event occurs if either  
 218  $A''$  or  $C$  merges with  $B$ . What is remarkable about this phenomenon is that  $A''$   
 219 and  $C$  have a more recent common ancestor than they have with  $B$ , but instead  
 220 of merging with each other, one of them merges with a more distant species.

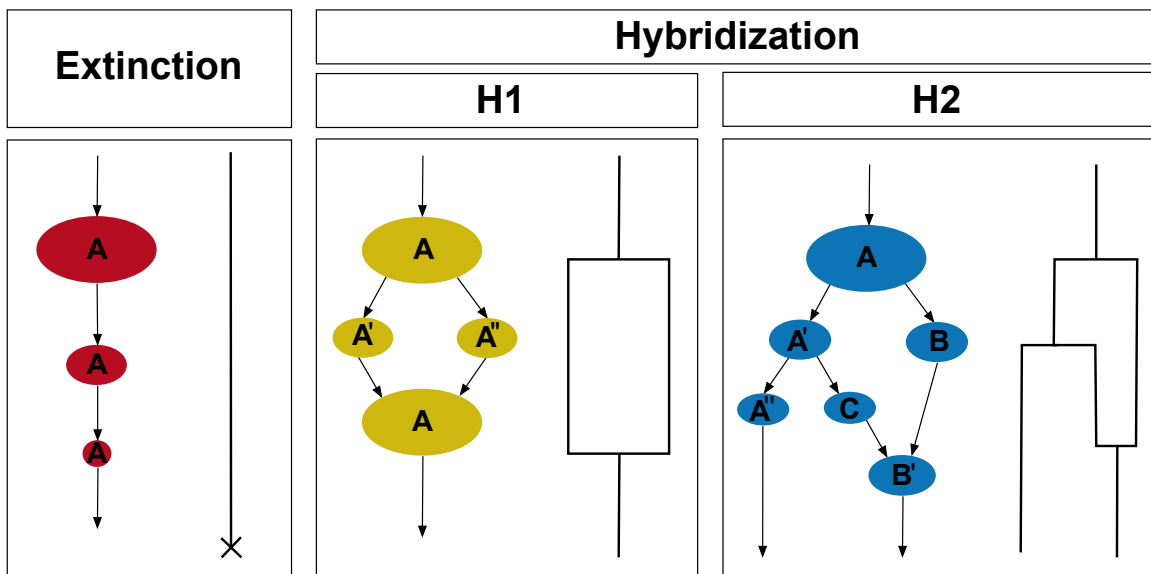

Figure 1: Representation of species population sizes and the respective phylogenetic tree scheme for each event. A true extinction requires that the species size decreases until no descendants are left for the next generation. An H1 event requires that two species (here  $A'$  and  $A''$ ) hybridize after one speciation process. An H2 event requires that two species (here  $C$  and  $B$ ) hybridize after at least two speciation events.

## 221 Branch length and population sizes

222 In the simulations, we kept track of population sizes at the time the branches  
223 were interrupted by a true extinction or by a hybridization event. We also kept  
224 track of branch lengths, in all cases, to understand the distribution of times of  
225 species until extinction and hybridization events. To compute the population size  
226 and branch length, we considered the species with the smallest population size in  
227 each hybridization event. The largest species was considered the extant one at  
228 the moment of the event.

## 229 Probability of hybridization

230 To estimate the probability of hybridization, we consider two recently diverged  
231 species  $S_1$  and  $S_2$  and calculate the probability that offspring, belonging to these  
232 species, will be able to mate after mutations and genetic recombination of their  
233 parents' genomes. Mating will restore gene flow and, therefore, merge the species  
234 together.

235 In our model, the minimum genetic distance between parents in  $S_1$  and  $S_2$  is  $G$ .  
236 Let the average genetic distance (normalized to genome size) be  $(G+\Delta)/B \equiv g+\delta$ .  
237 Defining the similarity between individuals  $i$  and  $j$  by  $q^{(i,j)} = 1 - 2d^{(i,j)}/B$ ,  
238 the minimum similarity required for mating is  $q_{min} = 1 - 2g$  and the average  
239 similarity between individuals in  $S_1$  and  $S_2$  is  $q_\delta = 1 - 2(G + \Delta)/B = q_m - 2\delta$ .  
240 The distribution of similarities  $\rho(q)$  between offspring from  $S_1$  and  $S_2$  can be  
241 approximated by a Gaussian with average  $q_\delta$  and variance  $\sigma_0^2/B$ , where  $\sigma_0^2 =$   
242  $1 - (1 - q_\delta)^2/4$  (see SM). The probability that offspring will reinstate the genetic  
243 flow between  $S_1$  and  $S_2$  is

$$P = \int_{q_m}^1 \rho(q) dq. \quad (3)$$

244 In section 3 of the Supplemental Material, we shown that  $P$  depends critically

245 on genome size and is given by :

$$P = \frac{1}{2} \left\{ 1 - \operatorname{erf} \left[ \frac{4\mu q_m + 2\delta}{\sigma_0(q_m, \mu)} \sqrt{B} \right] \right\} \quad (4)$$

246 where  $\operatorname{erf}(x)$  is the error function:  $\operatorname{erf}(x) = \frac{2}{\sqrt{\pi}} \int_0^x e^{-x^2} dx$ . As genome size  $B$   
247 increases, the error function approaches 1 and hybridization events stop. Because  
248 the argument involves the square root of  $B$ , we expect an exponential decrease  
249 in the probability of hybridization with genome size.

## 250 Results

251 Here we present results of simulations for different genome sizes ( $B = 150$ ,  
252  $B = 1,500$  and  $B = 15,000$ ). In all cases we ran 50 simulations for 5,000  
253 generations. Figure 2 shows how the simulations look like. The colorful plots  
254 represent snapshots of the spatial community at a given generation. The small  
255 squares and stars represent the individuals and the different colors represent the  
256 different species. The first row highlights a species undergoing a true extinction  
257 process, with its individuals depicted by red stars and decreasing in number; at  
258 the last temporal plot, only one individual of this species is still alive. Because no  
259 reproduction is possible, for lack of sexual partners, this species is extinct in the  
260 next generation. The second row represents an H1 event: the individuals of the  
261 species represented by black stars split into two species (black stars and yellow  
262 stars) and after some generations, the individuals represented by yellow stars hy-  
263 bridize with the individuals represented by black stars, forming only one species  
264 again. An H2 event is represented on the third row, in which an initial species  
265 (represented by black stars individuals) splits twice – into the species represented  
266 by the individuals in blue stars and after that, into the species represented by  
267 the individuals in orange stars. After the second split, individuals of the species

268 which splitted first (blue stars) hybridize with the original species (black stars).  
269 The full phylogenetic tree containing all the example events (represented by the  
270 stars) and also other events of true extinctions (red circles), H1 (yellow circles),  
271 and H2 (blue circles), as well as extant species, represented by green circles. In  
272 the Supplementary Material (SM), in Fig. S2, we show the same phylogenetic  
273 tree of Fig. 2, with only the extant species, as usually phylogenetic trees are  
274 represented.

275 The cumulative number of events along 5,000 generations, for 50 simulations,  
276 are represented in Fig. 3. True extinctions are more frequent for larger genomes  
277 ( $B = 1,500$  and  $B = 15,000$ ) and happen under a constant rate for all genome  
278 sizes. Hybridization processes are more frequent for smaller genome and have an  
279 accelerated rate in the beginning of the evolutionary process. H1 events becomes  
280 constant after some time (approximately after 1,300 generations for  $B = 150$  and  
281 as early as 100 generations for the larger genomes); H2 events, on the other hand,  
282 vanish after some generations, reaching a null rate after an initial positive start.

283 The population size at the moment the event happened varies according to  
284 the event (Fig 4). True extinctions always present low population sizes, measured  
285 at the last generation the species existed, which is consistent to how we define it.  
286 In average, species reach a population size of 2 individuals before vanishing by  
287 true extinction. Hybridization events happen in larger population sizes, with an  
288 average of 50 individuals, which is about the average size of extant species after  
289 the species richness equilibration for the parameters used in the simulation (see  
290 Fig. S5 in the SM). Similar distributions for the population sizes are observed for  
291 the other genome sizes for each event (see results for  $B = 1,500$  and  $B = 15,000$   
292 in Fig S3 of the SM).

293 Species duration, measured by the branch length of the species from the mo-  
294 ment it appeared until the moment of the event, is different for each type of  
295 event (Fig 4). True extinctions happen both in recently formed species (short



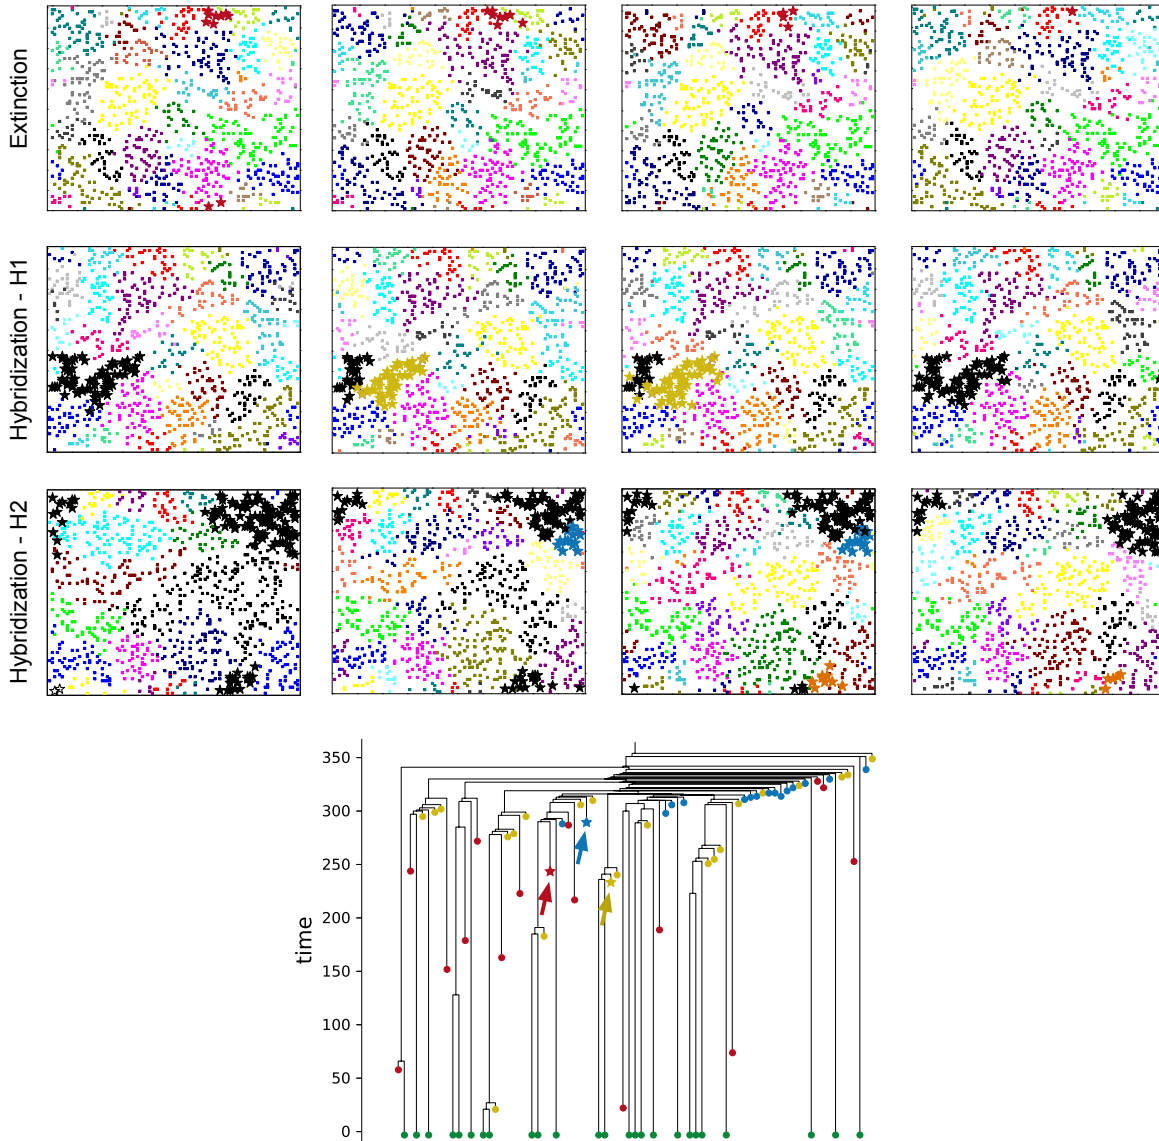

Figure 2: Representation of the three events (true extinction, H1 and H2) in a temporal sequence (above) and in the full phylogenetic tree of events (bellow). The exemplified events are represented in the full phylogenetic tree by stars (true extinction in red, H1 in yellow and H2 in blue) and pointed by arrows. The full phylogenetic tree also has all the other events of true extinctions (red circles), H1 (yellow circles), and H2 (blue circles). The extant species are represented in green circles. See text (Results Section) for more information.

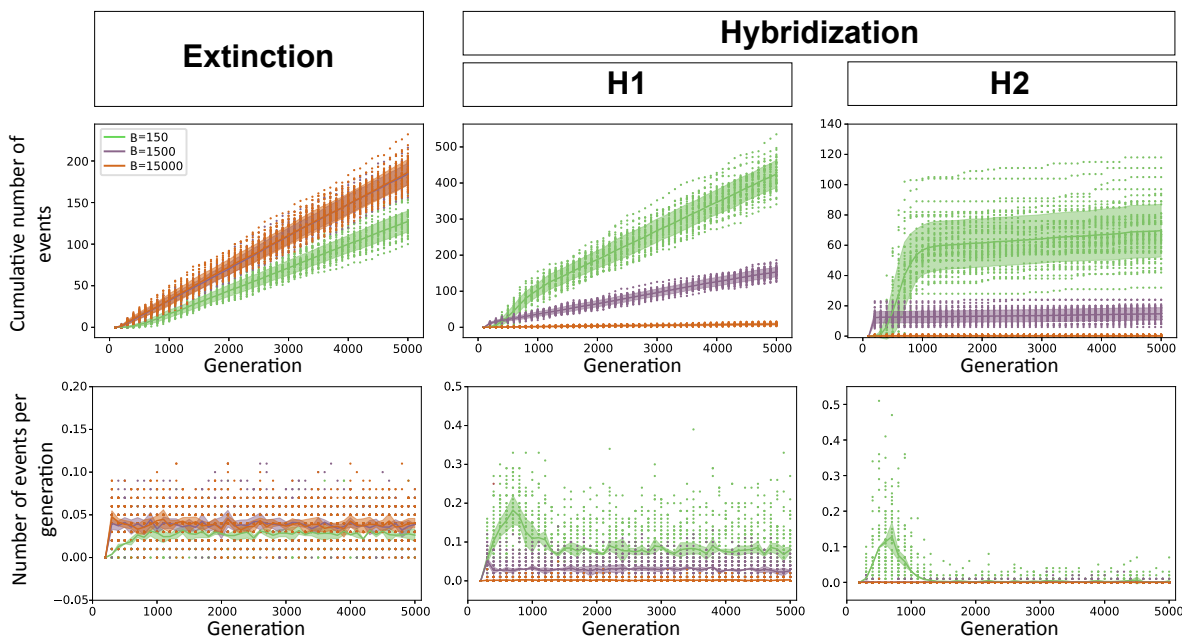

Figure 3: Cumulative number of events along 5,000 generations for 50 simulations (first row) and the respective rates (second row) for three different genome sizes ( $B$ ). Colored points represent simulations, lines are averages over simulations and shaded area are standard deviations.

296 branch lengths) and in old species, with a long history (long branch lengths).  
 297 Hybridization events, on the other hand, always have short duration, *i.e.* H1 and  
 298 H2 events happen few generations after the species branching. H1 events occur  
 299 typically 10 generations after the splitting, whereas H2 events have a significant  
 300 probability of occurring later, after 20 generations. These differences between the  
 301 two mechanisms of hybridization are expected, since H2 events require at least  
 302 two speciation events, whereas H1 events may happen after only one speciation  
 303 event. The results for different genomes sizes are presented in Fig S4, in the SM.  
 304 H1 events are always more frequent than H2 events, but for larger genome sizes,  
 305 hybridization events become more rare. True extinctions have similar distribu-  
 306 tions for all genome sizes.

307 Fig. 5 shows the probability of hybridization –  $P(B)$  – according to the  
 308 theoretical model (continuous line) for each genome size in relation to the genome

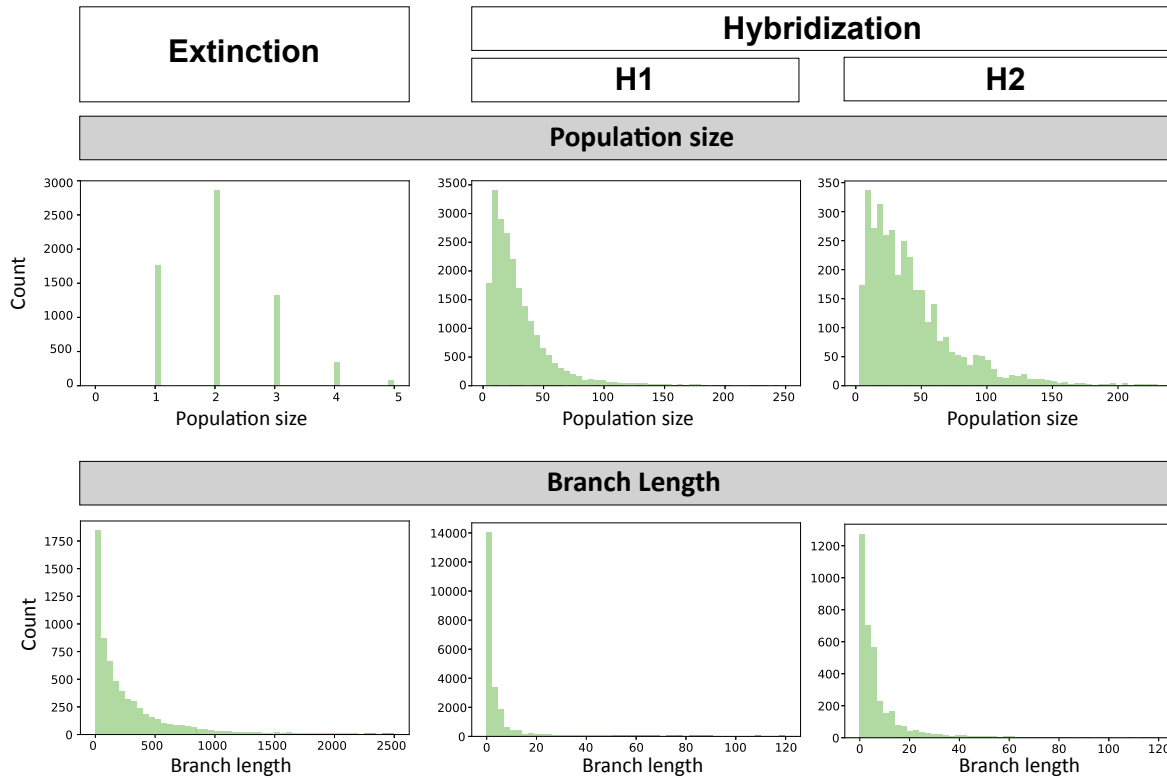

Figure 4: On the first row, population size at the moment of each event for  $B = 150$  (see Fig. S3 and text for more details for  $B = 1, 500$  and  $B = 15,000$ ). On the second row, distribution of the branch length from the speciation moment until each event moment for  $B = 150$  (see Fig. S4 and text for more details for  $B = 1, 500$  and  $B = 15,000$ ). Results were accumulated along 5,000 generations for 50 simulations.

309 size  $B = 150$ . We present the average (black circles) and error bars of frequencies  
310 observed in the simulations. The events of hybridization were counted at the  
311 end of generation 5,000. Notice that hybridization events for genomes larger  
312 than  $B = 1,500$  are less than 50% of those observed for  $B = 150$ , and also that  
313 fluctuation around the average is greater for smaller genomes.

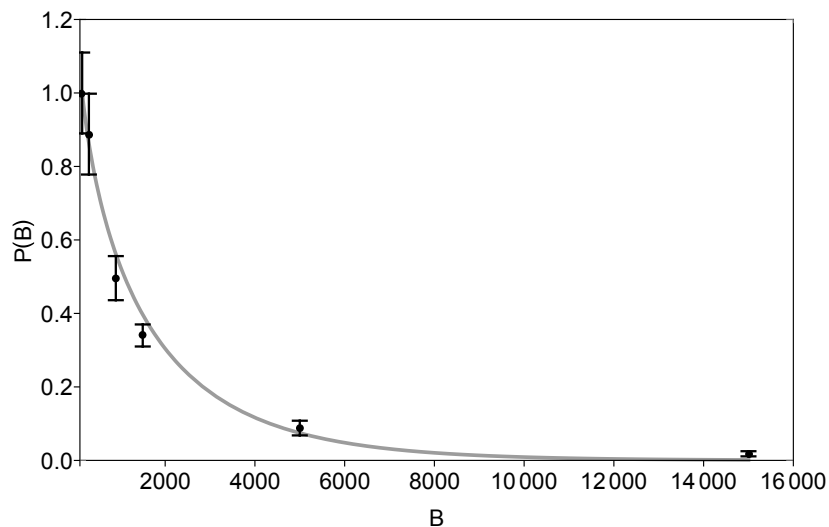

Figure 5: Probability of hybridization  $P(B)$  as a function of genome size  $B$ . Line shows the theoretical prediction and black circles with error bars show the results of simulations. Points were scaled so that  $P(150) = 1$ .

314 Fig. 6 shows the number of successful speciation events (SSE) by the total  
315 number of speciation events (SE) accumulated over 100 generations and grouped,  
316 by colors, every 500 generations. We define SSE in a time interval as the difference  
317 between the number of extant species at the end and beginning of the interval,  
318 added to the number of true extinctions that happened in that same period of  
319 time. For example, if there are 10 extant species at  $t=1000$  and 12 at  $t=1100$ ,  
320 SSE would be 2 if there were no extinctions. If 1 true extinction is registered,  
321 then another successful speciation event must have occurred and  $SSE=3$ . The  
322 total number of speciation events – SE, is the sum of SSE with the number of  
323 hybridization events. We do not consider hybridization event as SSE, since its  
324 net effect is zero. Fig. 6 shows that smaller genome sizes have larger number

325 of hybridization events than larger genomes. Moreover, the radiation period for  
326 larger genomes, included in the period of 0 to 500 generations (see Fig. S1 in the  
327 SM), presents a higher number of events compared to the equilibrium, what is  
328 evidenced by the separation of the points in the plot.

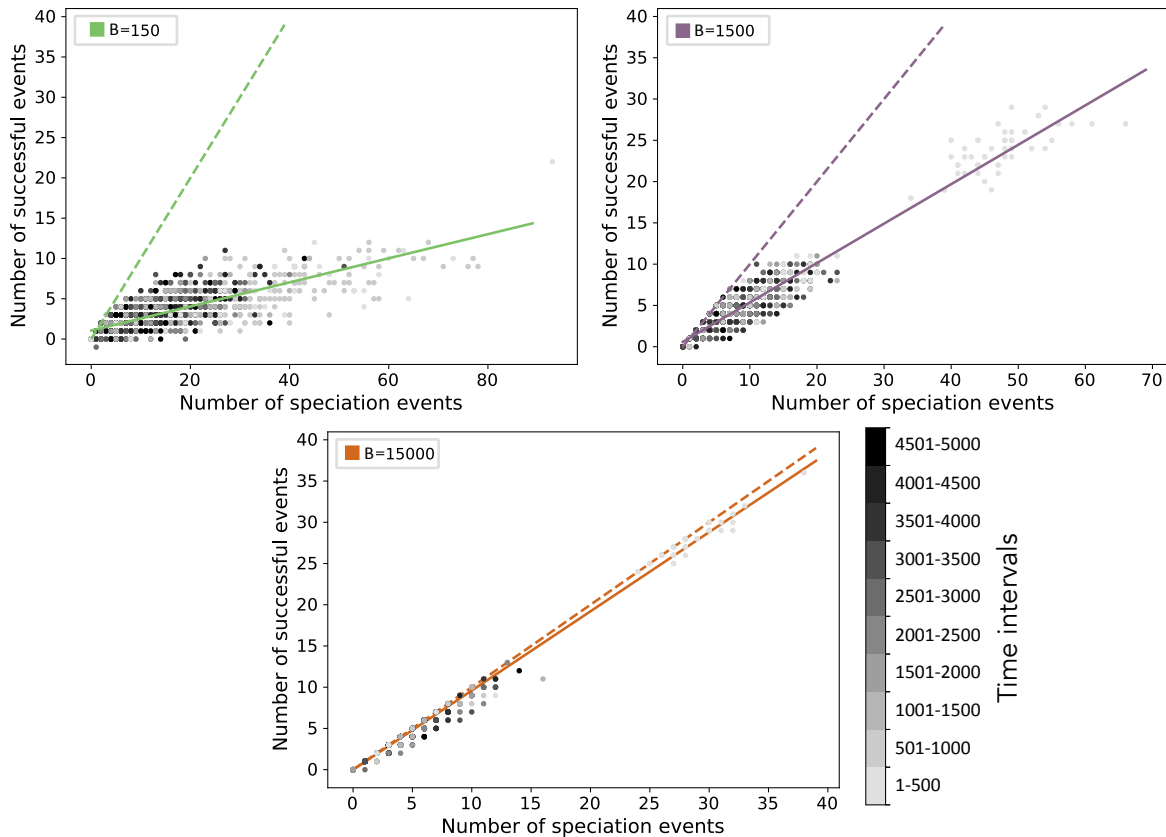

Figure 6: Number of successful events by the number of speciation events. We accumulate events every 100 generations. The plotted points are colored according to the interval in the gray scale. Therefore, there are 5 points at each of these intervals. Genome sizes are  $B = 150$  (top left),  $B = 1500$  (top right) and  $B = 15000$  (bottom). The dashed line is the 1:1 relationship and the continuous line is the regression given by the points of simulations.

## Discussion

In this paper we simulated the process of speciation under a neutral evolutionary scenario using an individual based model. The information stored during the evolutionary process allowed us to reconstruct complete phylogenetic trees, containing information, not only about the living species and their histories, but also about the species that disappeared along the process. We classified the disappearance of species into two basic types of events: true extinctions and hybridization, which were then further subdivided into hybridization after one speciation event, H1, and hybridization after two speciation events, H2. We analyzed how these events differ according to (i) when they occur in the evolutionary history, computing rates of occurrence along the time; (ii) species abundances at the moment of the event and; (iii) the duration of the species up to the moment of the event. All these features were strongly affected by the genome size, which can be interpreted as the amount of information, or traits, that are important for the genetic isolation and therefore to speciation.

Extinctions are hard to infer in the absence of detailed fossil record, but molecular methods to estimate extinction rates can be promising, although in some cases they are still controversial (Rabosky, 2010; He and Hubbell, 2011). Developing methods to solve the problem of underestimation of the number of extinction events is an active field of research (Pimm et al., 2014) and there are numerous evidences that population size is a crucial factor to the extinction of a species (Matthies et al., 2004; O’Grady et al., 2004; Stanley, 1986). In our work, the gradual decrease of the population size until no descendants are left to the next generation is called a true extinction. Since our model is neutral, true extinction events are driven by ecological drift, *i.e.*, random fluctuations of populations sizes.

We found that genome size affected the rate of true extinctions, with larger

356 genomes leading to slightly higher rates, specially during the radiation. We char-  
357 acterized how long species lasted until they disappeared by true extinction and  
358 we found that the distribution of species lifetimes followed the distribution of  
359 branch lengths of the extant species. This is expected since there are no forces  
360 or processes, other than stochastic fluctuations, that can increase the probabil-  
361 ity of a species face true extinction. Ecological drift is believed to be of great  
362 importance in non-neutral communities (Orrock and Watling, 2010; Gilbert and  
363 Levine, 2017). Here we offer a paradigm of how ecological drift on a neutral evo-  
364 lutionary model can be useful as an benchmark for comparison with extinctions in  
365 non-neutral models. For instance, the effect of human disturbance on extinction  
366 rate of several species has been measured but lacks an expectation for compari-  
367 son (Pimm et al., 2014). Although extinction estimation is a recurrent theme in  
368 neutral models in ecology and evolution (Lande, 1992; Pannell and Charlesworth,  
369 1999; Hubbell, 2001), we believe this is the first time this estimation was made  
370 under a macroevolutionary perspective of a microevolutionary model.

371 Hybridization changes the tree-like structure of phylogenies into more com-  
372 plex, reticulated evolutionary histories. Known factors that promote hybridiza-  
373 tion include environmental conditions, such as water turbidity (Seehausen et al.,  
374 1997; Taylor et al., 2006) and climate change (Seehausen et al., 2008); ecological  
375 interactions as parasites-mediated selection for hybrids (Kleindorfer et al., 2014);  
376 misprinting (Grant and Grant, 1997, 2014) and the scarcity of sexual mates (Willis  
377 et al., 2011). We showed that hybridization (both H1 and H2) also occurs in the  
378 absence of selective forces and are more frequent if the genome size is small, de-  
379 creasing as the genome size increases and reaching nearly zero for  $B = 15000$ , in  
380 accordance with Eq. 4. This is clearly evidenced by the relationship between the  
381 number of successful events and the number of speciation events for the different  
382 genomes sizes, which is shown in Fig. 6, where the difference between the esti-  
383 mated linear regression and the slope 1:1 is the average number of hybridization

384 events and can also be observed in Fig. 3, in which it is shown the cumulative  
385 number and the respective rate of each event, for each genome size.

386 Hybridization is related to rapid speciation (Lamichhaney et al., 2018), *i.e.*,  
387 to the radiation period, in which the number of extant species is still rising. We  
388 found that H2 are rare events and mainly occur during the initial radiation pro-  
389 cess, while H1 are more common and happens throughout the whole evolutionary  
390 process. The probability that mutations and recombination will lead to an H2  
391 event between two species is very small since it requires at least two speciation  
392 events, which takes several generations. On the other hand, if the speciation  
393 process is recent, H1 is more likely, as the species have more similar genomes.  
394 Therefore, H1 events of recently split species are expected to happen during the  
395 whole evolutionary history, being responsible for a large proportion of the hy-  
396 bridization events, while H2 events are expected to happen mainly during the  
397 radiation, when species still have similar genomes. This is shown in Fig. 6 where  
398 it is possible to observe a clear separation between the radiation process (light  
399 gray points) and after species richness equilibration (darker points) for genome  
400 sizes  $B = 1500$  and  $B = 15000$ . For the smallest genome size ( $B = 150$ ), this  
401 separation is not as clear. However it is still possible to identify a more separated  
402 group of light gray points, which can be assigned to H2, since they are detected  
403 mainly during the radiation, and rarely occur for larger genomes.

404 The analysis of population sizes at the moment of the event revealed that  
405 the distribution of population sizes for hybridization after one or two speciation  
406 processes (H1 and H2) displays a large average abundance, of the order of 50  
407 individuals. Therefore hybridization events are not related to the lack of sexual  
408 partners or small population sizes in our neutral scenario: it suffices that genetic  
409 flow is reestablished between two individuals of different species. Therefore we  
410 expect that population abundances for both H1 and H2 events should be similar  
411 to the distribution of extant species, which is indeed observed (see Fig S5 on the



412 SM).

413 Finally we characterized how long species last until they disappear by each  
414 type of event. Hybridization is more frequent for recent species (branch length  
415 lower than 40 generations), which shows that hybridization events usually happen  
416 soon after species differentiation. Although most known cases of such events agree  
417 with this temporal result (Kearns et al., 2018), there are some cases, apparently  
418 more rare, in which species that differentiated millions of years ago, generate vi-  
419 able offspring in nature or in lab experiments (Kearns et al., 2018; Káldy et al.,  
420 2020). In nature, where geographical barriers often exist, hybridization is con-  
421 strained by both genetic and spatial distances, likely increasing the characteristic  
422 time of this event. In our model, although no spatial barriers exist, species are  
423 localized in space and only nearby species can hybridize. However, right after  
424 speciation, the sister species are spatially close (see Fig. 2) and if individuals  
425 respect the genetic criteria for reproduction, there is a high probability that a hy-  
426 bridization will in fact happen. This results in short characteristic times. Events  
427 of type H2, however, display a wider distribution of branch lengths than type H1  
428 (branch length lower than 8 generations), which may be explained by the number  
429 of speciation processes involved in each type of hybridization. Considering the  
430 speciation rate is approximately constant after an initial radiation, two specia-  
431 tion events would take a longer time to happen than only one. In conclusion, in  
432 a neutral scenario, extinctions are events related to demographic aspects while  
433 hybridization events are related to the moment of the evolutionary history of the  
434 species.

435 Future works can explore the effect of natural selection, how environment  
436 heterogeneity and dynamics (such as habitat loss and barriers) can affect the  
437 observed patterns of extinction and hybridization events under this model frame-  
438 work, in the same lines of Gascuel et al. (2015) and Kagawa and Takimoto (2018).  
439 Moreover, hybridization events not necessarily lead to species diversity reduction.

440 In fact, it is common that hybridization detected in nature shows hybrid indi-  
441 viduals coexisting with the parental forms in sympatry (Duenez-Guzman et al.,  
442 2009; Kagawa and Takimoto, 2018; Marques et al., 2019). Therefore, we believe it  
443 might be possible to characterize ancestors and hybrids coexistence by the genetic  
444 distribution, detecting clusters of similar genomes corresponding to the merging  
445 species and the hybrids, or by community formation in the network of gene flow  
446 between individuals. It would also be interesting to know how long a species last  
447 after hybridization.

448 Historically, hybridization has been more studied in plant species, and possibly  
449 the lack of techniques for detecting hybridization in animal species, added to  
450 historical contingencies (Mayr, 1963), resulted in a biased literature (Schwenk  
451 et al., 2008). We believe the same bias exists in theoretical studies, with few  
452 studies estimating and characterizing it in the most basic models – but see the  
453 important contributions of McCarthy et al. (1995); Buerkle et al. (2000); Duenez-  
454 Guzman et al. (2009); Kagawa and Takimoto (2018). We hope more theoretical  
455 studies, new molecular techniques, and important field studies can emerge and  
456 prosper on the frontiers of species definition.

## 457 Data archiving

458 There is no data associated with this paper.

## 459 Acknowledgements

460 Suppressed due to the double-blind reviewing process.

## 461 References

- 462 Abbott, R., D. Albach, S. Ansell, J. W. Arntzen, S. J. Baird, N. Bierne, J. Bough-  
463 man, A. Brelsford, C. A. Buerkle, R. Buggs, et al., 2013. Hybridization and  
464 speciation. *Journal of Evolutionary Biology* 26:229–246.
- 465 de Aguiar, M. A. M., 2017. Speciation in the Derrida–Higgs model with finite  
466 genomes and spatial populations. *Journal of Physics A: Mathematical and*  
467 *Theoretical* 50:085602.
- 468 de Aguiar, M. a. M., M. Baranger, E. M. Baptestini, L. Kaufman, and Y. Bar-  
469 Yam, 2009. Global patterns of speciation and diversity. *Nature* 460:384–387.
- 470 Baptestini, E. M., M. A. de Aguiar, and Y. Bar-Yam, 2013. Conditions for neutral  
471 speciation via isolation by distance. *Journal of Theoretical Biology* 335:51–56.
- 472 Buerkle, C. A., R. J. Morris, M. A. Asmussen, and L. H. Rieseberg, 2000. The  
473 likelihood of homoploid hybrid speciation. *Heredity* 84:441–451.
- 474 Costa, C. L., P. Lemos-Costa, F. M. Marquitti, L. D. Fernandes, M. F. Ramos,  
475 D. M. Schneider, A. B. Martins, and M. A. de Aguiar, 2019. Signatures of mi-  
476 croevolutionary processes in phylogenetic patterns. *Systematic Biology* 68:131–  
477 144.
- 478 Duenez-Guzman, E. A., J. Mavárez, M. D. Vose, and S. Gavrillets, 2009. Case  
479 studies and mathematical models of ecological speciation. 4. hybrid speciation  
480 in butterflies in a jungle. *Evolution* 63:2611–2626.
- 481 Garrick, R. C., E. Benavides, M. A. Russello, C. Hyseni, D. L. Edwards, J. P.  
482 Gibbs, W. Tapia, C. Ciofi, and A. Caccone, 2014. Lineage fusion in Galápagos  
483 giant tortoises. *Molecular Ecology* 23:5276–5290.
- 484 Gascuel, F., R. Ferrière, R. Aguilée, and A. Lambert, 2015. How ecology and  
485 landscape dynamics shape phylogenetic trees. *Systematic Biology* 64:590–607.
- 486 Gilbert, B. and J. M. Levine, 2017. Ecological drift and the distribution of species  
487 diversity. *Proceedings of the Royal Society B: Biological Sciences* 284:20170507.

- 488 Grant, P. R. and B. R. Grant, 1997. Hybridization, sexual imprinting, and mate  
489 choice. *The American Naturalist* 149:1–28.
- 490 ———, 2014. 40 years of evolution: Darwin’s finches on Daphne Major island.  
491 Princeton University Press.
- 492 Grant, P. R., B. R. Grant, J. A. Markert, L. F. Keller, and K. Petren, 2004.  
493 Convergent evolution of Darwin’s finches caused by introgressive hybridization  
494 and selection. *Evolution* 58:1588–1599.
- 495 He, F. and S. P. Hubbell, 2011. Species–area relationships always overestimate  
496 extinction rates from habitat loss. *Nature* 473:368–371.
- 497 Higgs, P. G. and B. Derrida, 1991. Stochastic models for species formation  
498 in evolving populations. *Journal of Physics A: Mathematical and General*  
499 24:L985–L991.
- 500 Hubbell, S. P., 2001. The unified neutral theory of biodiversity and biogeography  
501 (MPB-32), vol. 32. Princeton University Press.
- 502 Kagawa, K. and G. Takimoto, 2018. Hybridization can promote adaptive radia-  
503 tion by means of transgressive segregation. *Ecology Letters* 21:264–274.
- 504 Káldy, J., A. Mozsár, G. Fazekas, M. Farkas, D. L. Fazekas, G. L. Fazekas,  
505 K. Goda, Z. Gyöngy, B. Kovács, K. Semmens, et al., 2020. Hybridization of  
506 russian sturgeon (*acipenser gueldenstaedtii*, brandt and ratzeberg, 1833) and  
507 american paddlefish (*polyodon spathula*, walbaum 1792) and evaluation of their  
508 progeny. *Genes* 11:753.
- 509 Kearns, A. M., M. Restani, I. Szabo, A. Schrøder-Nielsen, J. A. Kim, H. M.  
510 Richardson, J. M. Marzluff, R. C. Fleischer, A. Johnsen, and K. E. Omland,  
511 2018. Genomic evidence of speciation reversal in ravens. *Nature Communica-*  
512 *tions* 9:906.
- 513 Kleindorfer, S., J. A. O’Connor, R. Y. Dudaniec, S. A. Myers, J. Robertson, and  
514 F. J. Sulloway, 2014. Species collapse via hybridization in Darwin’s tree finches.  
515 *The American Naturalist* 183:325–341.
- 516 Lamichhaney, S., F. Han, M. T. Webster, L. Andersson, B. R. Grant, and P. R.  
517 Grant, 2018. Rapid hybrid speciation in Darwin’s finches. *Science* 359:224–228.
- 518 Lande, R., 1992. Neutral theory of quantitative genetic variance in an island  
519 model with local extinction and colonization. *Evolution* 46:381–389.
- 520 MacLeod, A., A. Rodríguez, M. Vences, P. Orozco-terWengel, C. García,  
521 F. Trillmich, G. Gentile, A. Caccone, G. Quezada, and S. Steinfartz, 2015.  
522 Hybridization masks speciation in the evolutionary history of the Galápagos  
523 marine iguana. *Proceedings of the Royal Society B: Biological Sciences*  
524 282:20150425.

- 525 Marques, D. A., J. I. Meier, and O. Seehausen, 2019. A combinatorial view on  
526 speciation and adaptive radiation. *Trends in Ecology & Evolution* 34:531 –  
527 544.
- 528 Matthies, D., I. Bräuer, W. Maibom, and T. Tschardt, 2004. Population size  
529 and the risk of local extinction: empirical evidence from rare plants. *Oikos*  
530 105:481–488.
- 531 Mayr, E., 1963. *Animal species and evolution*. Belknap Press of Harvard Univer-  
532 sity Press, Cambridge, MA.
- 533 McCarthy, E. M., M. A. Asmussen, and W. W. Anderson, 1995. A theoretical  
534 assessment of recombinational speciation. *Heredity* 74:502–509.
- 535 O’Grady, J. J., D. H. Reed, B. W. Brook, and R. Frankham, 2004. What are the  
536 best correlates of predicted extinction risk? *Biological Conservation* 118:513–  
537 520.
- 538 Orrock, J. L. and J. I. Watling, 2010. Local community size mediates ecological  
539 drift and competition in metacommunities. *Proceedings of the Royal Society*  
540 *B: Biological Sciences* 277:2185–2191.
- 541 Pannell, J. R. and B. Charlesworth, 1999. Neutral genetic diversity in a metapop-  
542 ulation with recurrent local extinction and recolonization. *Evolution* 53:664–  
543 676.
- 544 Pimm, S. L., C. N. Jenkins, R. Abell, T. M. Brooks, J. L. Gittleman, L. N. Joppa,  
545 P. H. Raven, C. M. Roberts, and J. O. Sexton, 2014. The biodiversity of species  
546 and their rates of extinction, distribution, and protection. *Science* 344.
- 547 Pyron, R. A., K. A. O’Connell, E. M. Lemmon, A. R. Lemmon, and D. A. Beamer,  
548 2020. Phylogenomic data reveal reticulation and incongruence among mito-  
549 chondrial candidate species in Dusky salamanders (*Desmognathus*). *Molecular*  
550 *Phylogenetics and Evolution* 146:106751.
- 551 Rabosky, D. L., 2010. Extinction rates should not be estimated from molecular  
552 phylogenies. *Evolution: International Journal of Organic Evolution* 64:1816–  
553 1824.
- 554 Rudman, S. M. and D. Schluter, 2016. Ecological impacts of reverse speciation  
555 in threespine stickleback. *Current Biology* 26:490–495.
- 556 Schwenk, K., N. Brede, and B. Streit, 2008. Introduction. extent, processes and  
557 evolutionary impact of interspecific hybridization in animals. *Philosophical*  
558 *Transactions of the Royal Society B: Biological Sciences* 363:2805–2811.
- 559 Seehausen, O., 2004. Hybridization and adaptive radiation. *Trends in Ecology &*  
560 *Evolution* 19:198–207.

- 561 Seehausen, O., J. J. M. v. Alphen, and F. Witte, 1997. Cichlid fish diversity  
562 threatened by eutrophication that curbs sexual selection. *Science* 277:1808–  
563 1811.
- 564 Seehausen, O., G. Takimoto, D. Roy, and J. Jokela, 2008. Speciation reversal and  
565 biodiversity dynamics with hybridization in changing environments. *Molecular*  
566 *Ecology* 17:30–44.
- 567 Stanley, S. M., 1986. Population size, extinction, and speciation: the fission effect  
568 in Neogene Bivalvia. *Paleobiology* Pp. 89–110.
- 569 Taylor, E., J. Boughman, M. Groenenboom, M. Sniatynski, D. Schluter, and  
570 J. Gow, 2006. Speciation in reverse: morphological and genetic evidence of  
571 the collapse of a three-spined stickleback (*Gasterosteus aculeatus*) species pair.  
572 *Molecular Ecology* 15:343–355.
- 573 Todesco, M., M. A. Pascual, G. L. Owens, K. L. Ostevik, B. T. Moyers, S. Hübner,  
574 S. M. Heredia, M. A. Hahn, C. Caseys, D. G. Bock, et al., 2016. Hybridization  
575 and extinction. *Evolutionary applications* 9:892–908.
- 576 Willis, P. M., M. J. Ryan, and G. G. Rosenthal, 2011. Encounter rates with  
577 conspecific males influence female mate choice in a naturally hybridizing fish.  
578 *Behavioral Ecology* 22:1234–1240.
- 579 Zhang, D., F. E. Rheindt, H. She, Y. Cheng, G. Song, C. Jia, Y. Qu, P. Alström,  
580 and F. Lei, 2021. Most genomic loci misrepresent the phylogeny of an avian  
581 radiation because of ancient gene flow. *Systematic Biology* .
